# Supplementary material for: Role of the Anilinium Ion on the Selective Polymerization of Anilinium 2-Acrylamide-2-methyl-1-propanesulfonate
Source: MDPI journal article supplement (doi:10.3390/polym13142349), 2021-07-17
Supplement: s1 [file s1]

# **Role of the anilinium ion on the selective polymerization of anilinium 2-acrylamide-2-methyl-1-propanesulfonate**

**Alain S. Conejo-Dávila<sup>1</sup>, M. Armando Moya-Quevedo<sup>1</sup>, David Chávez-Flores<sup>2</sup>, Alejandro Vega-Rios<sup>1,\*</sup> and E. Armando Zaragoza-Contreras<sup>1,\*</sup>**

<sup>1</sup> Department of Engineering and Materials Chemistry. Centro de Investigación en Materiales Avanzados, SC. Miguel de Cervantes No. 120, Complejo Industrial Chihuahua, Chihuahua, Chih., México. C.P. 31136.

<sup>2</sup> Facultad de Ciencias Químicas. Universidad Autónoma de Chihuahua, Chihuahua, Chih., México. C.P. 31125.

\* Correspondence: AVR [alejandro.vega@cimav.edu.mx](mailto:alejandro.vega@cimav.edu.mx); EAZC [Armando.zaragoza@cimav.edu.mx](mailto:Armando.zaragoza@cimav.edu.mx)

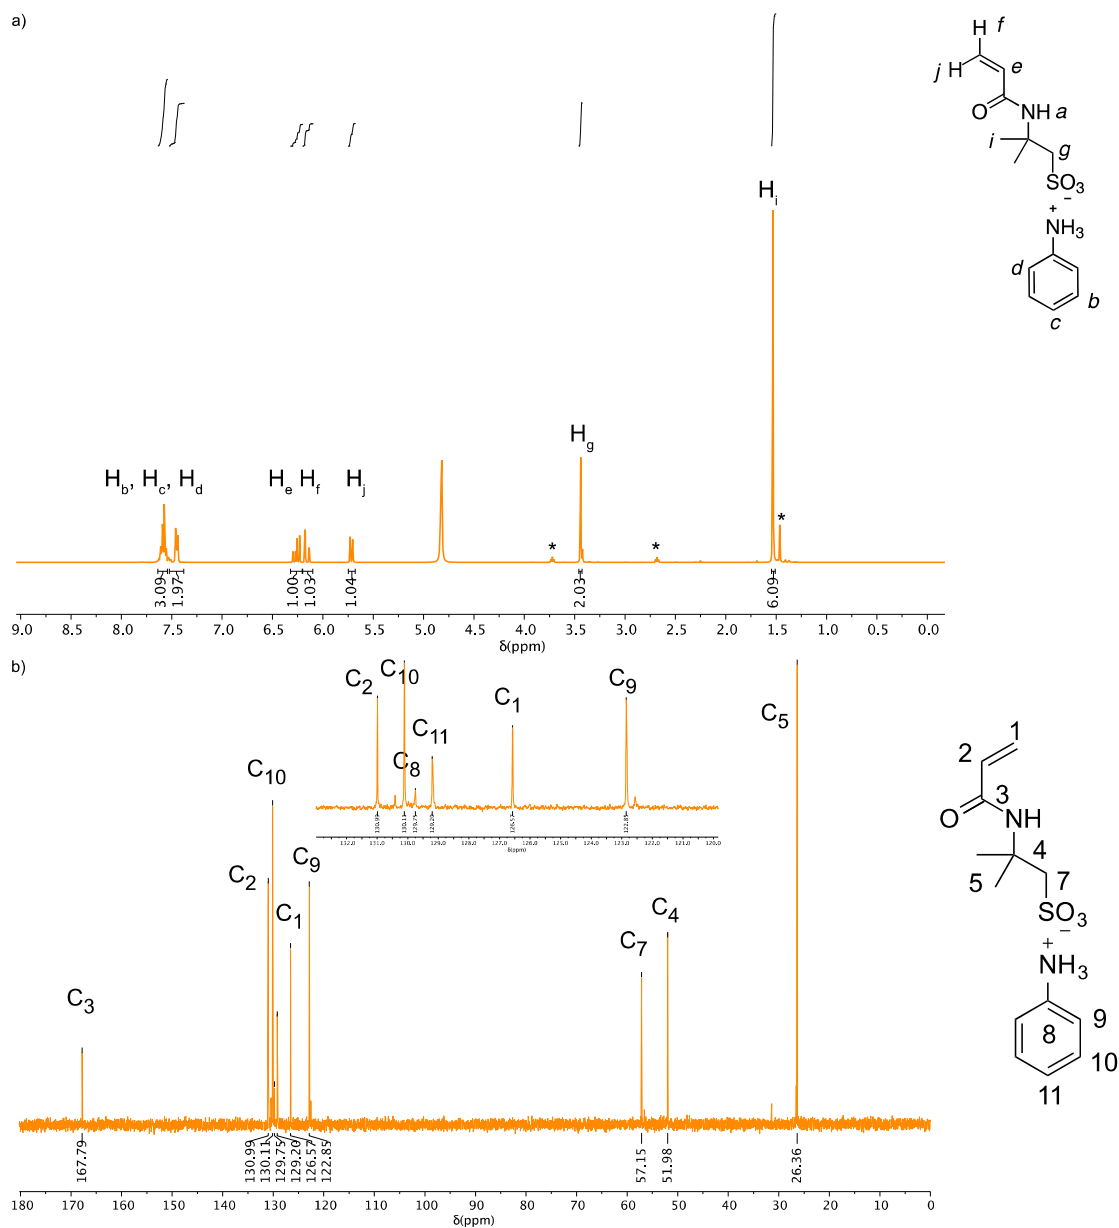

Figure S1. NMR spectra. a)  $^1\text{H}$  NMR (400 MHz, Deuterium Oxide)  $\delta$  7.64 – 7.54 (m, 3H), 7.45 (dt,  $J$  = 8.0, 1.5 Hz, 2H), 6.26 (dd,  $J$  = 17.1, 10.1 Hz, 1H), 6.16 (dd,  $J$  = 17.1, 1.5 Hz, 1H), 5.72 (dd,  $J$  = 10.1, 1.5 Hz, 1H), 3.44 (s, 2H), 1.53 (s, 6H). \*By-products of monomer synthesis, specifically oligomers. b)  $^{13}\text{C}$  NMR (101 MHz, Deuterium oxide)  $\delta$  197.79, 130.99, 130.11, 129.75, 129.20, 126.57, 122.85, 57.15, 51.98, 26.36 ppm.

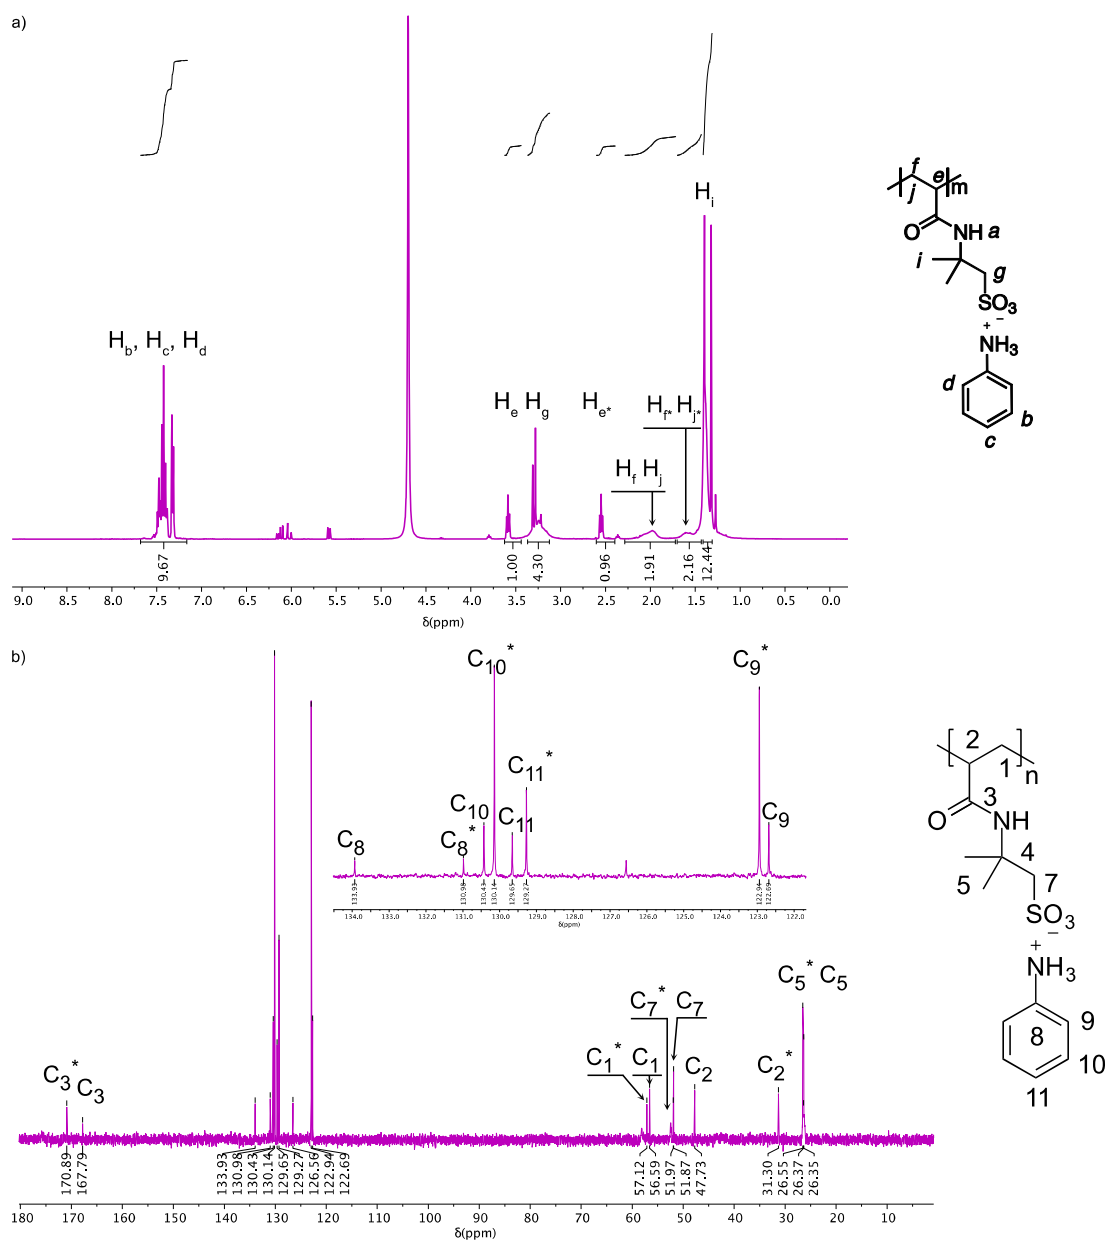

Figure S2.  $^1\text{H}$  NMR (400 MHz, Deuterium Oxide)  $\delta$  7.80-7.29 (m, 10H), 3.71 (t,  $J = 6.3$  Hz, 1H), 3.49-3.25 (m, 4H), 2.67 (t,  $J = 6.3$  Hz, 1H), 2.10 (m, 2H), 1.82-1.55 (m, 2H), 1.53-1.43 (m, 12H);  $^{13}\text{C}$  NMR (101 MHz, Deuterium Oxide)  $\delta$  170.89, 167.79, 133.93, 130.98, 130.43, 130.14, 129.65, 129.67, 126.56, 122.94, 122.69, 57.12, 56.59, 51.97, 51.87, 47.73, 31.30, 26.55, 26.37, 26.35 ppm.

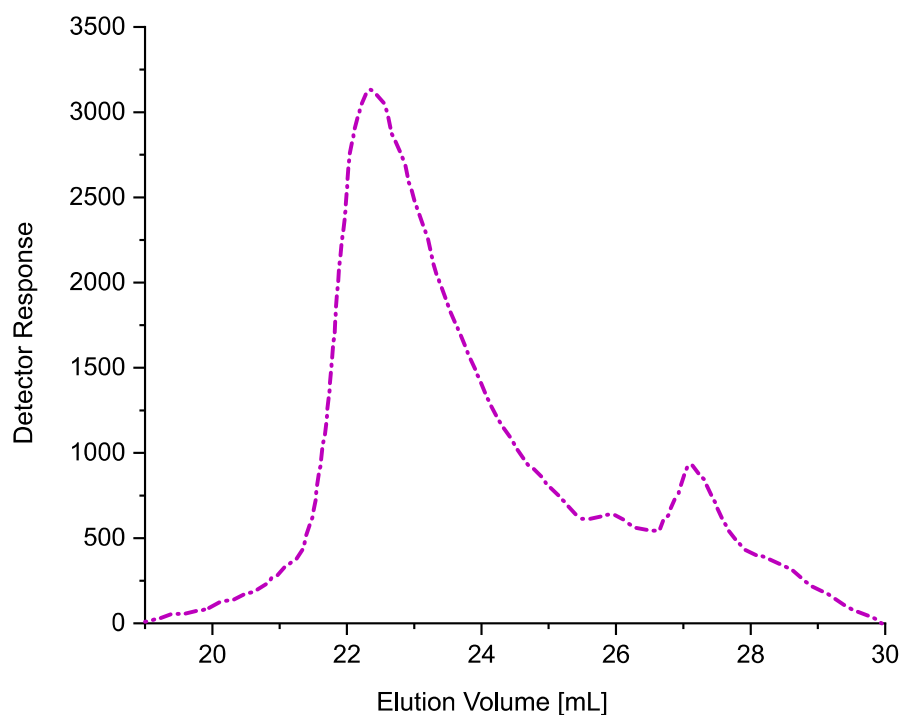

Figure S3. GPC chromatogram of Poly(Ani-AMPS),  $M_n=2,126$  g/mol,  $M_w=9,345$  g/mol, IPD=4.39.

a)

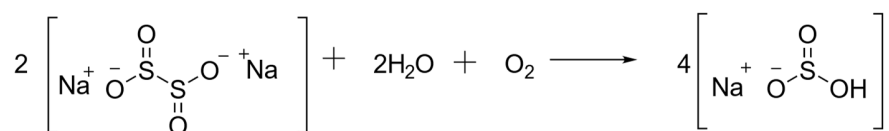

b)

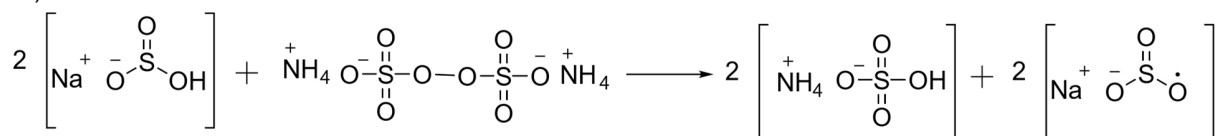

Figure S4. a) Scheme of the decomposition of sodium metabisulfite; b) its reaction with ammonium persulfate.

Table S1. Fluorescence intensity values concerning concentration of  $\text{Fe}^{2+}$ .

| The intensity of emission signal at 348 nm in presence on $\text{Fe}^{2+}$ |                |                |                |      |                    |
|----------------------------------------------------------------------------|----------------|----------------|----------------|------|--------------------|
| Concentration of $\text{Fe}^{2+}$ ( $\mu\text{M}$ )                        | 1° Measurement | 2° Measurement | 3° Measurement | Mean | Standard Deviation |

|      |        |        |        |        |       |
|------|--------|--------|--------|--------|-------|
| 0    | 68.861 | 69.012 | 69.472 | 69.115 | 0.318 |
| 500  | 62.378 | 60.889 | 58.020 | 60.429 | 2.215 |
| 1000 | 46.135 | 46.507 | 46.206 | 46.283 | 0.197 |
| 1500 | 41.089 | 39.331 | 42.633 | 41.018 | 1.652 |
| 2000 | 35.700 | 34.506 | 35.042 | 35.083 | 0.598 |
| 2500 | 31.266 | 28.530 | 30.865 | 30.220 | 1.478 |
| 3000 | 25.885 | 25.493 | 27.207 | 26.195 | 0.898 |
| 3500 | 22.752 | 21.606 | 24.065 | 22.808 | 1.230 |
| 4000 | 19.955 | 18.954 | 18.681 | 19.197 | 0.671 |

Table S2. Fluorescence intensity values concerning concentration of  $\text{Fe}^{3+}$ .

| The intensity of emission signal at 348 nm in presence on $\text{Fe}^{3+}$ |                |                |                |        |                    |
|----------------------------------------------------------------------------|----------------|----------------|----------------|--------|--------------------|
| Concentration of $\text{Fe}^{3+}$ ( $\mu\text{M}$ )                        | 1° Measurement | 2° Measurement | 3° Measurement | Mean   | Standard Deviation |
| 0                                                                          | 68.861         | 69.012         | 69.472         | 69.115 | 0.318              |
| 20                                                                         | 57.426         | 57.825         | 59.055         | 58.102 | 0.849              |
| 40                                                                         | 52.886         | 51.003         | 51.870         | 51.920 | 0.942              |
| 60                                                                         | 45.470         | 44.002         | 45.338         | 44.937 | 0.812              |
| 80                                                                         | 39.535         | 40.946         | 38.248         | 39.576 | 1.349              |
| 100                                                                        | 36.006         | 35.730         | 34.203         | 35.313 | 0.971              |
| 150                                                                        | 29.931         | 30.645         | 29.580         | 30.052 | 0.543              |
| 200                                                                        | 25.693         | 25.424         | 24.287         | 25.135 | 0.746              |
| 250                                                                        | 19.899         | 19.788         | 20.625         | 20.104 | 0.455              |
| 300                                                                        | 14.358         | 15.337         | 14.814         | 14.836 | 0.490              |
| 350                                                                        | 10.262         | 11.210         | 10.889         | 10.787 | 0.482              |
| 400                                                                        | 7.501          | 7.072          | 7.048          | 7.207  | 0.255              |
